# Supplementary material for: Effects of DNA Topology on Transcription from rRNA Promoters in Bacillus subtilis
Source: PubMed Central journal article supplement (PMC7824091; doi:10.3390/microorganisms9010087), 2021-01-01
Supplement: microorganisms-09-00087-s001.pdf [file microorganisms-09-00087-s001.pdf]

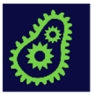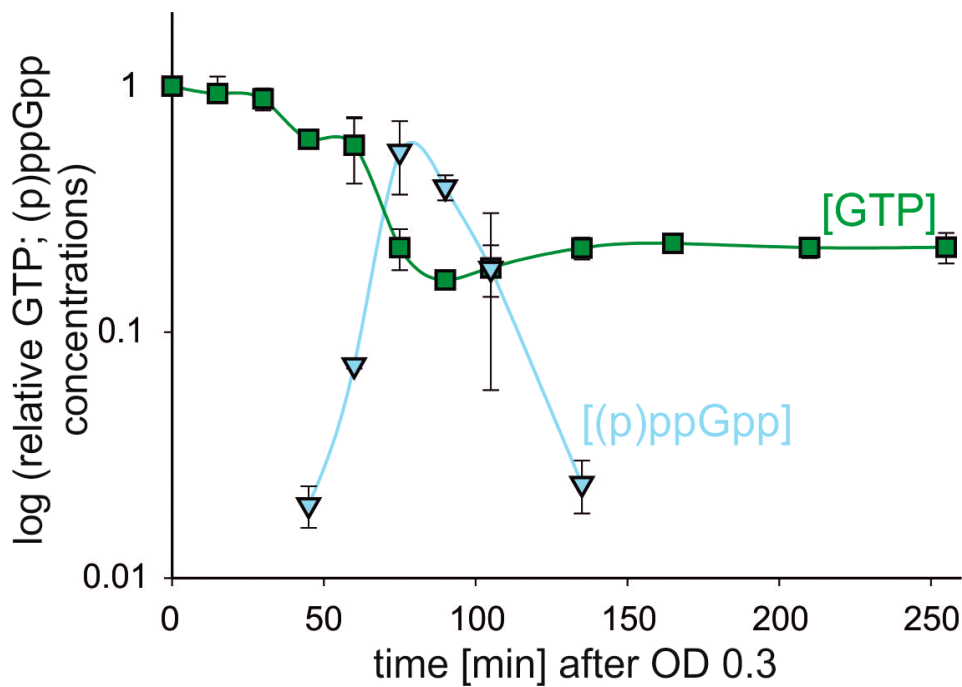

**Figure S1. Relative GTP and (p)ppGpp levels after entry into the stationary phase.**

Relative GTP concentration (green squares) and relative (p)ppGpp concentration (blue triangles) in wt genetic background after entry into stationary phase. The GTP concentration is normalized to 1 at time 0. The GTP concentration data are from two independent experiments; the graph shows the mean and the error bars the range. (p)ppGpp concentration are from the same experiments as GTP (Figure 1), shown relative to GTP.

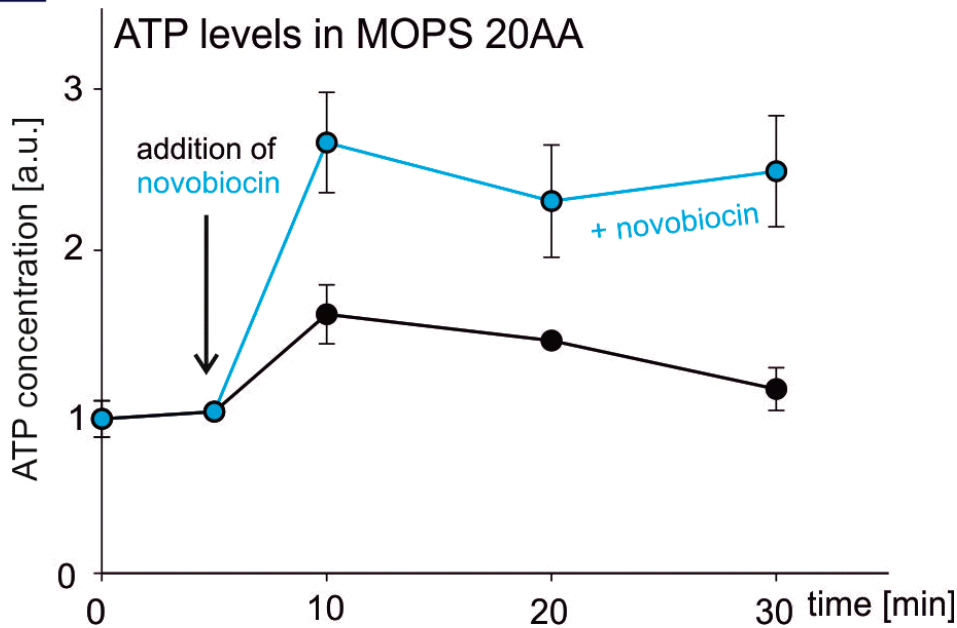

**Figure S2. Effect of novobiocin-induced relaxation of chromosome on ATP levels.**

Cells were grown in MOPS media supplemented with 20 amino acids with  $[^{32}\text{P}] \text{H}_3\text{PO}_4$  to early exponential phase ( $\text{OD}_{600} \sim 0.3$ ). At time 5 min the cells were treated with novobiocin (5  $\mu\text{g}/\text{ml}$ ). Levels of ATP were determined by TLC from the same TLC plates as GTP levels in Figure 2D. The ATP level at time 5 min was set as 1. Results are averages from two measurements. The error bars show the range.

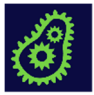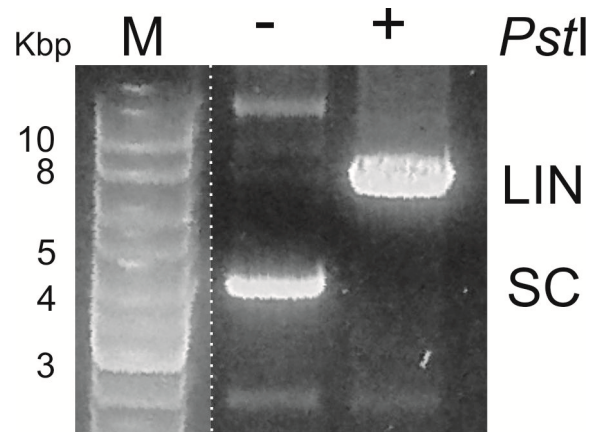

**Figure S3. SC and LIN promoter DNA on agarose gel.**

100 ng of DNA was resolved on 0.8 % agarose gel. M, DNA Mw marker (GeneRuler DNA Ladder Mix), +/- the treatment with restriction enzyme *Pst*I. The DNA gel was stained with GelRed. The marker was assembled electronically with the rest of the gel – indicated with the dotted line.

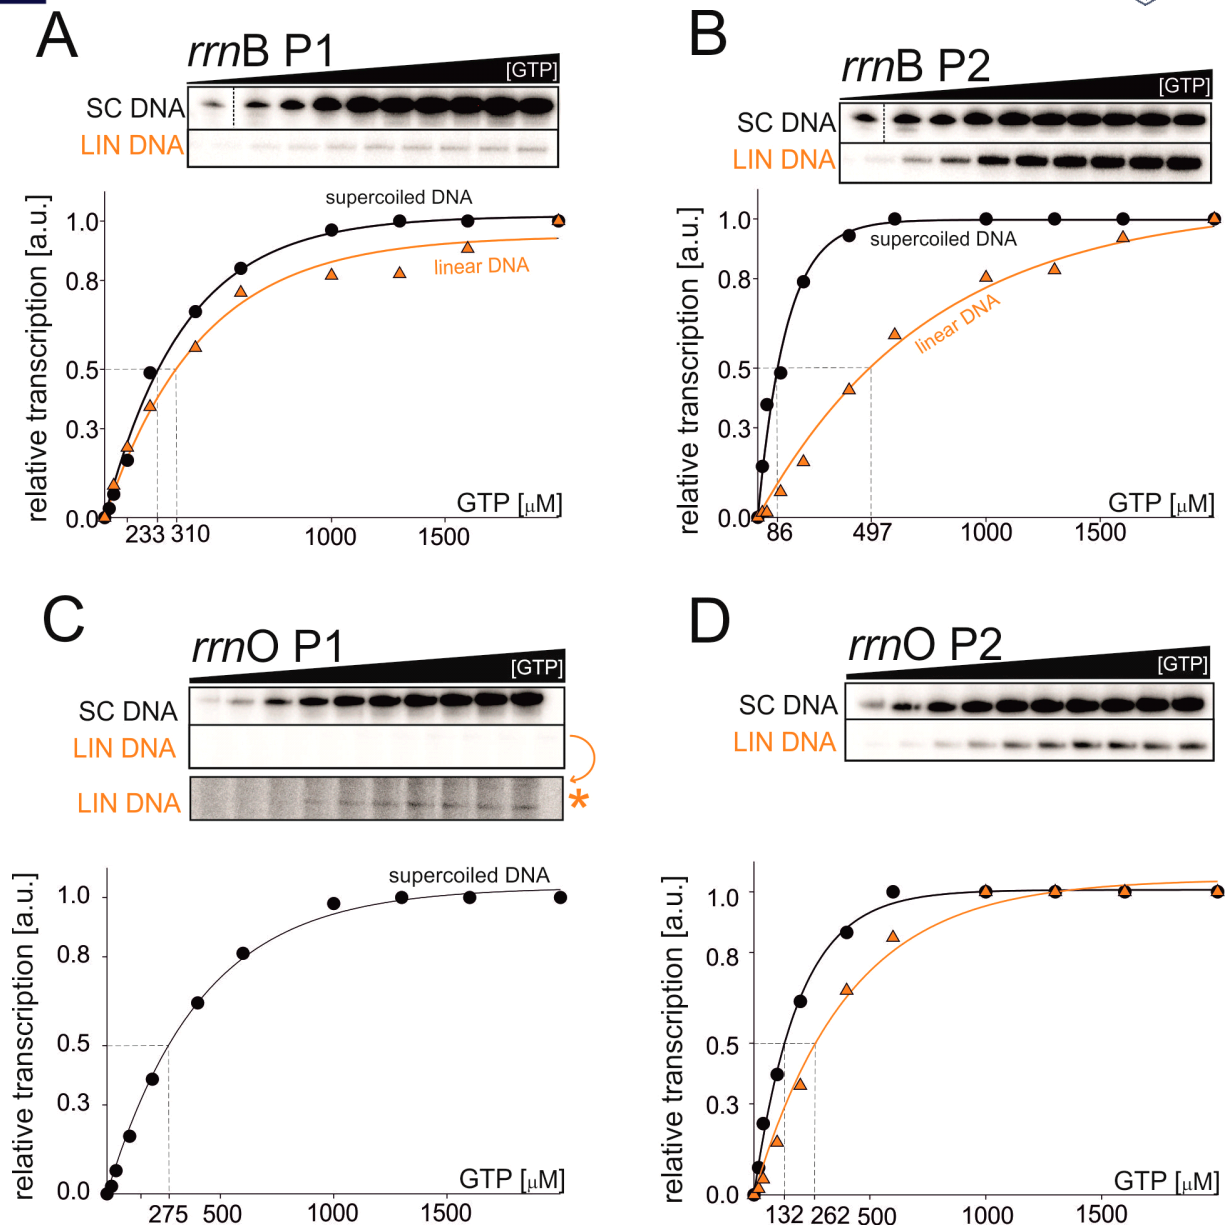

**Figure S4.** The affinity of RNAP for iNTP *in vitro* changes on different DNA templates.

Multiple-round transcriptions as a function of GTP concentration: representative primary data and their graphical comparison for *rrnB* P1 (A), *rrnB* P2 (B), *rrnO* P1 (C) and *rrnO* P2 (D). For LIN *rrnO* P1 levels of transcripts were close to the background so that they were almost not detectable. The panel marked with the asterisk (\*) shows the same data as the panel above but adjusted for brightness for better visibility. The  $K_{GTP}$  values are in Supplementary Table 1. The experiment was performed in at least three biological replicates.

**Table S1: The  $K_{GTP}$  values for the promoters tested in the transcriptions *in vitro*.**

The values were calculated at least from three independent experiments, showing the mean and  $\pm$  SD. ND means “not detectable”, as primary signal from transcription from LIN variant of *rrnO* P1 was too close to background (see Figure S4C).

| $K_{GTP}$ [ $\mu$ M] | SC $\pm$ SD  | LIN $\pm$ SD | Ratio SC/LIN |
|----------------------|--------------|--------------|--------------|
| <i>Pveg</i>          | 36 $\pm$ 9   | 511 $\pm$ 78 | ~ 14x        |
| <i>rrnB</i> P core   | 277 $\pm$ 24 | 440 $\pm$ 25 | ~ 1.5x       |
| <i>rrnB</i> P1       | 242 $\pm$ 31 | 361 $\pm$ 46 | ~ 1.5x       |
| <i>rrnB</i> P2       | 62 $\pm$ 13  | 427 $\pm$ 61 | ~ 7x         |
| <i>rrnO</i> P1       | 240 $\pm$ 18 | ND           |              |
| <i>rrnO</i> P2       | 98 $\pm$ 22  | 269 $\pm$ 8  | ~ 3x         |



**Table S2. Alternative  $\sigma$  factor-dependent promoters used in the study.**

Promoter consensus elements are in bold. The 3' ends of the sequences are transcription +1 positions.

| $\sigma$ factor | promoter        | Product function*                                | Sequence of promoter                                           | Reference |
|-----------------|-----------------|--------------------------------------------------|----------------------------------------------------------------|-----------|
| B               | <i>PtrxA</i>    | Protection of proteins against oxidative stress  | TCAGG <b>TTTT</b> AAAACAGCTCCGGCAGGGCATGGTAAAGTACA             | [1]       |
| D               | <i>PmotA</i>    | Motility and chemotaxis                          | AATGTC <b>CCTAAAGT</b> TCCGGGCACCAAA <b>ACCGATATTA</b> ACCATA  | [2]       |
| E               | <i>PspoIIID</i> | Regulator of mother cell expression              | ATATTCCCAAAAGAATGCTA <b>ATACACTGTT</b> ACA                     | [3]       |
| F               | <i>PspoIIQ</i>  | Forespore encasement by the spore coat           | TTGTATATATTTTCAGAAAAGTG <b>TTCAGAATGTTG</b> CTG                | [4]       |
| H               | <i>PspoVG</i>   | Cell division, control of sporulation initiation | AAAAACGAGCAGG <b>ATTT</b> CAGAAAAATCGT <b>GGAATTG</b> ATACACTA | [5]       |
| N               | <i>PzpaB</i>    | DNA gyrase <sup>#</sup>                          | <b>ATTTACGTTTT</b> AGAAAGACTAGATATA <b>AAAGATT</b> ACG         | [6]       |
| N               | <i>PzpbY</i>    | unknown <sup>#</sup>                             | <b>ATTTACGTTTT</b> CAAAGGCACAGATATA <b>ATAACA</b>              | [6]       |
| N               | <i>PzpdG</i>    | DNA pol III <sup>#</sup>                         | <b>ATTTACGTTTT</b> TGCCGGTCCAGATATA <b>ATAACTTTG</b>           | [6]       |
| N               | <i>sigN P3</i>  | Sigma factor <sup>#</sup>                        | TTTTCG <b>TTTACGTTT</b> CTATTTCTCTAGATA <b>AAATCATT</b> AAG    | [6]       |

\*according to [7].

# as published in [6].



**Supplementary references:**

1. Scharf, C.; Riethdorf, S.; Ernst, H.; Engelmann, S.; Völker, U.; Hecker, M. Thioredoxin is an essential protein induced by multiple stresses in *Bacillus subtilis*. *J. Bacteriol.* **1998**, *180*, 1869–1877, doi:10.1128/jb.180.7.1869-1877.1998.
2. Gilman, M.Z.; Wiggs, J.L.; Chamberlin, M.J. Nucleotide sequences of two *Bacillus subtilis* promoters used by *Bacillus subtilis* sigma-28 RNA polymerase. *Nucleic Acids Res.* **1981**, *9*, 5991–6000, doi:10.1093/nar/9.22.5991.
3. Kunkel, B.; Kroos, L.; Poth, H.; Youngman, P.; Losick, R. Temporal and spatial control of the mother-cell regulatory gene *spoIIID* of *Bacillus subtilis*. *Genes Dev.* **1989**, *3*, 1735–1744, doi:10.1101/gad.3.11.1735.
4. Amaya, E.; Khvorova, A.; Piggot, P.J. Analysis of Promoter Recognition In Vivo Directed by F of *Bacillus subtilis* by Using Random-Sequence Oligonucleotides. *J. Bacteriol.* **2001**, *183*, 3623–3630, doi:10.1128/JB.183.12.3623-3630.2001.
5. Haldenwang, W.G.; Losick, R. Novel RNA polymerase  $\sigma$  factor from *Bacillus subtilis*. *Proc. Natl. Acad. Sci. U. S. A.* **1980**, *77*, 7000–7004, doi:10.1073/pnas.77.12.7000.
6. Burton, A.T.; DeLoughery, A.; Li, G.W.; Kearns, D.B. Transcriptional regulation and mechanism of sigN (ZpdN), a pBS32-encoded sigma factor in *Bacillus subtilis*. *MBio* **2019**, *10*, e01899-19, doi:10.1128/mBio.01899-19.
7. Zhu, B.; Stülke, J. SubtiWiki in 2018: From genes and proteins to functional network annotation of the model organism *Bacillus subtilis*. *Nucleic Acids Res.* **2018**, *46*, D743–D748, doi:10.1093/nar/gkx908.
